# Supplementary material for: Phylogenetic Diversity and Ecological Pattern of Ammonia-oxidizing Archaea in the Surface Sediments of the Western Pacific
Source: PubMed Central journal article supplement — Microb Ecol. 2011 Jul 12;62(4):813. doi: 10.1007/s00248-011-9901-0 (PMC3206191; doi:10.1007/s00248-011-9901-0), 2011-07-12
Supplement: 248_2011_9901_MOESM5_ESM.pdf [file 248_2011_9901_MOESM5_ESM.pdf]

to outgroup

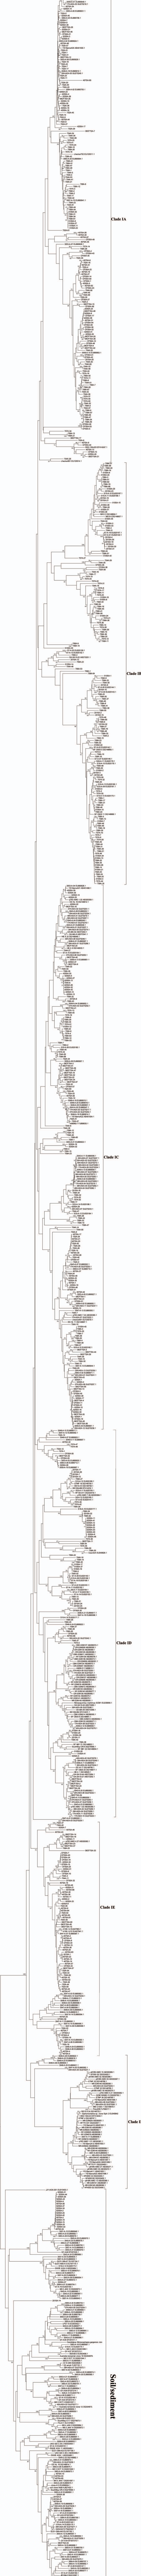

Clade IA

Clade IB

Clade IC

Clade ID

Clade IE

Clade IF

Soil sediment

Marine water column/sediment

to outgroup
